# Supplementary material
Source: PubMed Central journal article supplement (PMC3168557)
Supplement: NIHMS314199-supplement-text_and_figures.pdf [file NIHMS314199-supplement-text_and_figures.pdf]

## Supplementary Information

(Figures S1-S4, Tables S1 and S2 and Complete Gaussian Reference)

### Chalcogenidobis(ene-1,2-dithiolate)molybdenum(IV) Complexes (Chalcogenide E = S, Se): Probing Mo≡E and Ene-1,2-dithiolate Substituent Effects on Geometric and Electronic Structure

Hideki Sugimoto,<sup>\*a</sup> Hiroyuki Tano,<sup>b</sup> Koichiro Suyama,<sup>b</sup> Tomoya Kobayashi,<sup>b</sup> Hiroyuki Miyake,<sup>b</sup> Shinobu Itoh,<sup>\*a</sup> Regina P. Mtei,<sup>c</sup> and Martin L. Kirk<sup>\*c</sup>

<sup>a</sup> Department of Material and Life Science, Graduate School of Engineering, Osaka University, Osaka 565-0871, Japan. Fax: 81 6 6879 7933; Tel: 81 6 6879 7933

<sup>b</sup> Department of Chemistry, Graduate School of Science, Osaka City University, Sumiyoshi-ku, Osaka 558-8585, Japan.

<sup>c</sup> Department of Chemistry and Chemical Biology, The University of New Mexico, MSC03 2060, 1 University of New Mexico, Albuquerque, NM 87131-0001

\* To whom correspondence should be addressed. E-mail: [sugimoto@mls.eng.osaka-c.ac.jp](mailto:sugimoto@mls.eng.osaka-c.ac.jp); [shinobu@mls.eng.osaka-c.ac.jp](mailto:shinobu@mls.eng.osaka-c.ac.jp); [mkirk@unm.edu](mailto:mkirk@unm.edu)

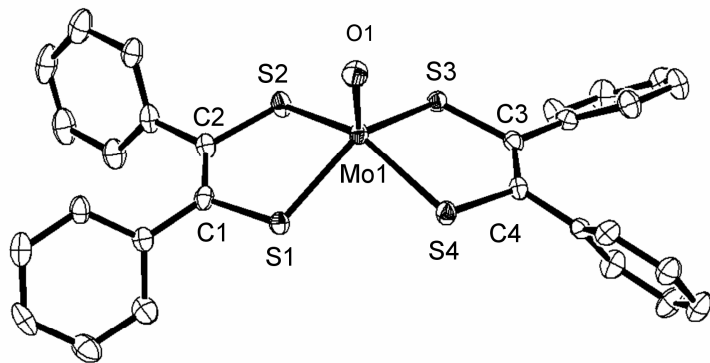

**Fig. S1** Crystal structure of the anionic part of **MoOL<sup>Ph</sup>** shown with 50% ellipsoids. The hydrogen atoms were omitted for clarity.

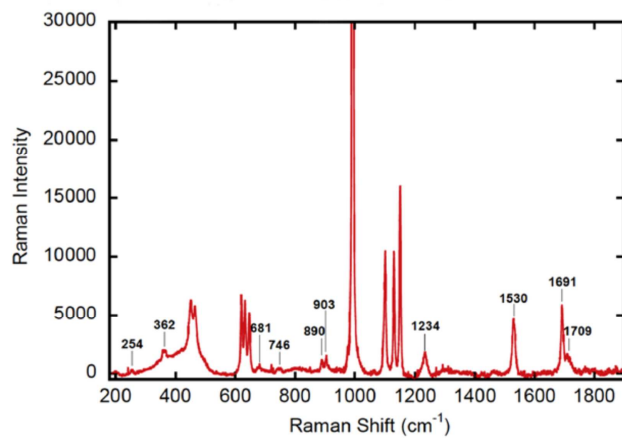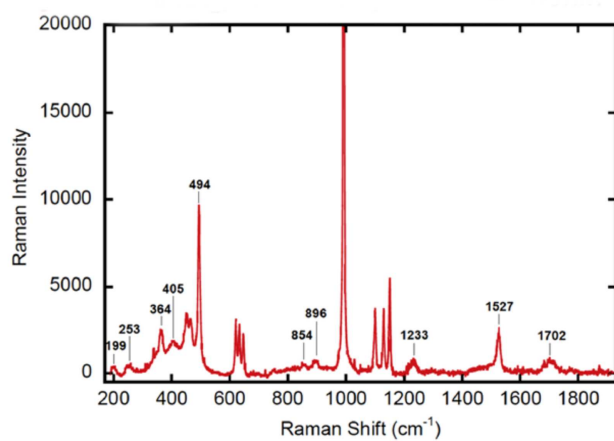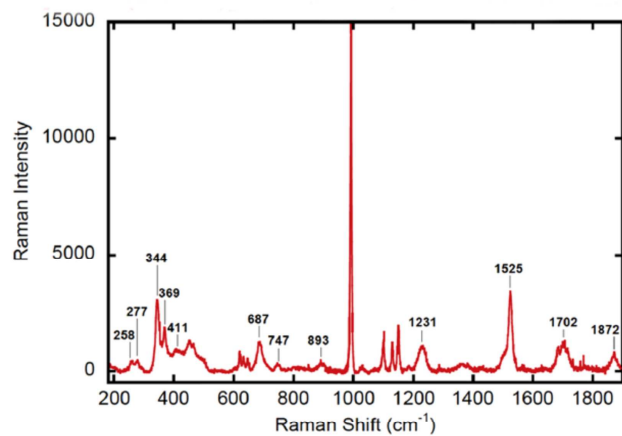

**Fig. S2** Solid State resonance Raman spectra collected at 458nm for **MoOL<sup>COOMe</sup>** (above), **MoSL<sup>COOMe</sup>** (middle), and **MoSeL<sup>COOMe</sup>** (bottom).

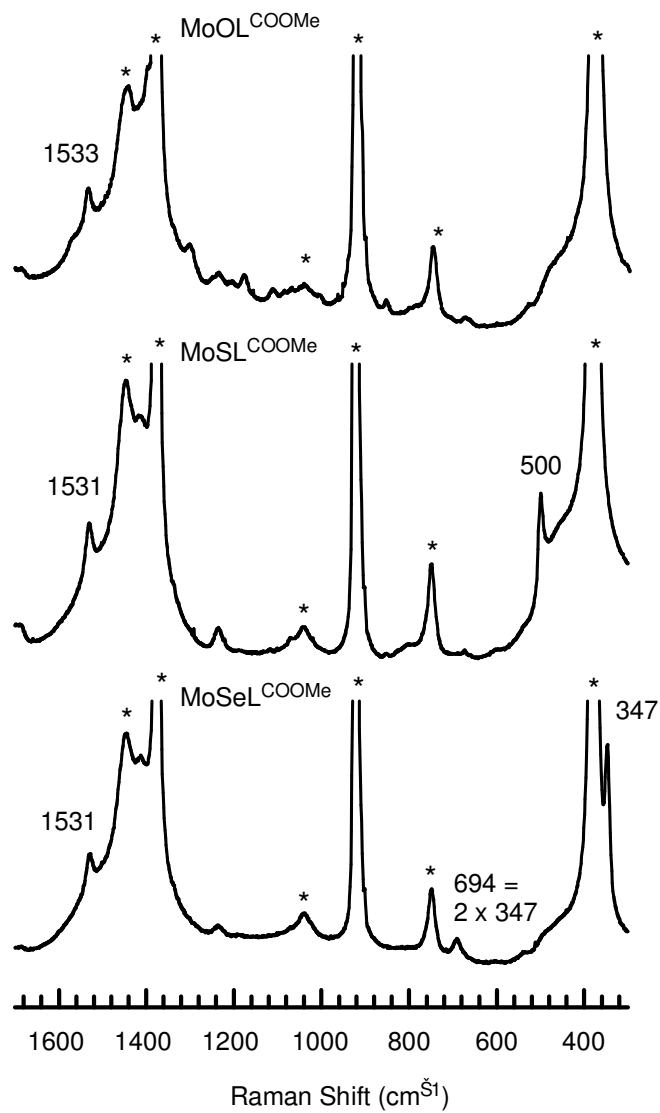

**Fig. S3** resonance Raman spectra of **MoOL<sup>COOMe</sup>** (above), **MoSL<sup>COOMe</sup>** (middle), and **MoSeL<sup>COOMe</sup>** (bottom) in CH<sub>3</sub>CN using Ar ion laser with excitation at 488 nm (asterisks indicate solvent peaks).

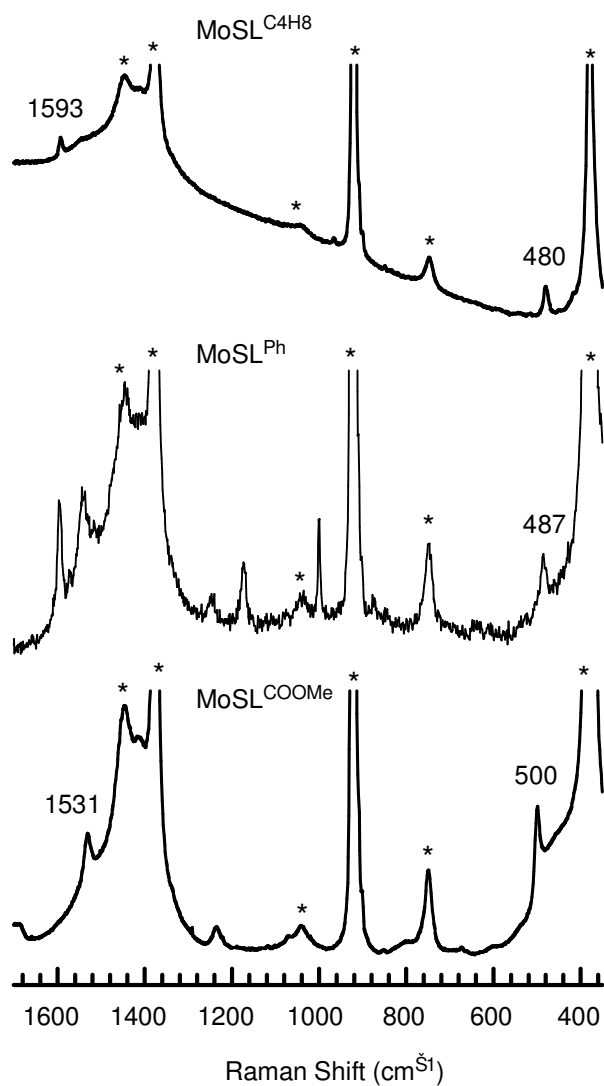

**Fig. S4** resonance Raman spectra of **MoSL<sup>C4H8</sup>** (above), **MoSL<sup>Ph</sup>** (middle), and **MoSL<sup>COOMe</sup>** (bottom) in CH<sub>3</sub>CN using Ar ion laser with excitation at 488 nm (asterisks indicate solvent peaks).

**Table S1** Crystallographic Data for **MoOL<sup>Ph</sup>**

| <b>MoOL<sup>Ph</sup></b>                                  |                                                                  |
|-----------------------------------------------------------|------------------------------------------------------------------|
| formula                                                   | C <sub>44</sub> H <sub>60</sub> MoN <sub>2</sub> OS <sub>4</sub> |
| fw                                                        | 857.15                                                           |
| cryst system                                              | monoclinic                                                       |
| space group                                               | <i>P2</i> <sub>1</sub>                                           |
| <i>a</i> , Å                                              | 14.733(9)                                                        |
| <i>b</i> , Å                                              | 8.778(5)                                                         |
| <i>c</i> , Å                                              | 17.409(11)                                                       |
| <i>β</i> , deg                                            | 104.966(10)                                                      |
| <i>V</i> , Å <sup>3</sup>                                 | 2175.0(23)                                                       |
| <i>Z</i>                                                  | 2                                                                |
| <i>ρ</i> , g cm <sup>-3</sup>                             | 1.309                                                            |
| <i>μ</i> , mm <sup>-1</sup>                               | 0.528                                                            |
| data                                                      | 21205                                                            |
| unique data                                               | 9877                                                             |
| <i>R</i> 1 <sup><i>a</i></sup>                            | 0.0443                                                           |
| <i>wR</i> 2 ( <i>F</i> <sup>2</sup> ) <sup><i>b</i></sup> | 0.1097                                                           |
| GOF                                                       | 1.028                                                            |

<sup>*a*</sup>  $R1 = \Sigma(|F_o| - |F_c|) / \Sigma|F_o|$ . <sup>*b*</sup>  $wR2 = \{ \Sigma(w(F_o^2 - F_c^2)^2) / \Sigma w(F_o^2)^2 \}^{1/2}$ .

**Table S2.** Selected Bond Distances (Å) and Angles (deg) of **MoOL<sup>Ph</sup>**

| <b>MoOL<sup>Ph</sup></b> |           |
|--------------------------|-----------|
| Mo1–O1                   | 1.709(2)  |
| Mo1–S1                   | 2.3874(7) |
| Mo1–S2                   | 2.3761(7) |
| Mo1–S3                   | 2.3824(8) |
| Mo1–S4                   | 2.3778(7) |
| S1–C1                    | 1.792(2)  |
| S2–C2                    | 1.782(3)  |
| S3–C3                    | 1.785(2)  |
| S4–C4                    | 1.786(3)  |
| C1–C2                    | 1.345(4)  |
| C3–C4                    | 1.369(5)  |
| Mo1–4S plane             | 0.7871(5) |
| O1–Mo1–S1                | 110.45(8) |
| O1–Mo1–S2                | 108.37(7) |
| O1–Mo1–S3                | 110.64(8) |
| O1–Mo1–S4                | 107.04(7) |
| S1–Mo1–S2                | 82.20(2)  |
| S1–Mo1–S3                | 138.89(2) |
| S1–Mo1–S4                | 86.70(2)  |
| S2–Mo1–S3                | 83.92(2)  |
| S2–Mo1–S4                | 144.57(3) |
| S3–Mo1–S4                | 82.67(2)  |

## Gaussian Reference

M. J. Frisch, G. W. T., H. B. Schlegel, G. E. Scuseria, M. A. Robb, J. R. Cheeseman, J. A. Montgomery, Jr., T. Vreven, K. N. Kudin, J. C. Burant, J. M. Millam, S. S. Iyengar, J. Tomasi, V. Barone, B. Mennucci, M. Cossi, G. Scalmani, N. Rega, G. A. Petersson, H. Nakatsuji, M. Hada, M. Ehara, K. Toyota, R. Fukuda, J. Hasegawa, M. Ishida, T. Nakajima, Y. Honda, O. Kitao, H. Nakai, M. Klene, X. Li, J. E. Knox, H. P. Hratchian, J. B. Cross, V. Bakken, C. Adamo, J. Jaramillo, R. Gomperts, R. E. Stratmann, O. Yazyev, A. J. Austin, R. Cammi, C. Pomelli, J. W. Ochterski, P. Y. Ayala, K. Morokuma, G. A. Voth, P. Salvador, J. J. Dannenberg, V. G. Zakrzewski, S. Dapprich, A. D. Daniels, M. C. Strain, O. Farkas, D. K. Malick, A. D. Rabuck, K. Raghavachari, J. B. Foresman, J. V. Ortiz, Q. Cui, A. G. Baboul, S. Clifford, J. Cioslowski, B. B. Stefanov, G. Liu, A. Liashenko, P. Piskorz, I. Komaromi, R. L. Martin, D. J. Fox, T. Keith, M. A. Al-Laham, C. Y. Peng, A. Nanayakkara, M. Challacombe, P. M. W. Gill, B. Johnson, W. Chen, M. W. Wong, C. Gonzalez, and J. A. Pople *Gaussian 03, Revision C.02*, Gaussian, Inc.: Wallingford CT, 2004.
